# Supplementary material for: Maternal circulating Vitamin D3 levels during pregnancy and behaviour across childhood
Source: PubMed Central journal article supplement (PMC6794315; doi:10.1038/s41598-019-51325-3), 2019-10-15
Supplement: 41598_2019_51325_MOESM1_ESM.pdf [file 41598_2019_51325_MOESM1_ESM.pdf]

## **Maternal circulating Vitamin D<sub>3</sub> levels during pregnancy and behaviour across childhood**

Mónica López-Vicente, Jordi Sunyer, Nerea Lertxundi, Llúcia González, Cristina Rodríguez-Dehli, Mercedes Espada Sáenz-Torre, Martine Vrijheid, Adonina Tardón, Sabrina Llop, Maties Torrent, Jesús Ibarluzea, Mònica Guxens

Supplementary Tables (S1 to S4)

Supplementary Table S1. Characteristics of participants according to maternal 25(OH)D<sub>3</sub> concentrations in pregnancy

|                                             | <b>25(OH)D<sub>3</sub>-<br/>deficient (&lt;20<br/>ng/mL) (n=372)</b> | <b>25(OH)D<sub>3</sub>-<br/>insufficient (20-<br/>29 ng/mL)<br/>(n=767)</b> | <b>25(OH)D<sub>3</sub>-<br/>sufficient (&gt;=30<br/>ng/mL) (n=968)</b> | <b>Total<br/>(n=2107)</b> | <b>Missings<br/>(%)</b> |
|---------------------------------------------|----------------------------------------------------------------------|-----------------------------------------------------------------------------|------------------------------------------------------------------------|---------------------------|-------------------------|
| <b>Region (n, %)</b>                        |                                                                      |                                                                             |                                                                        |                           | 0                       |
| Menorca                                     | 44 (11.8)                                                            | 109 (14.2)                                                                  | 108 (11.2)                                                             | 261 (12.4)                |                         |
| Valencia                                    | 55 (14.8)                                                            | 156 (20.3)                                                                  | 305 (31.5)                                                             | 516 (24.5)                |                         |
| Sabadell                                    | 109 (29.3)                                                           | 155 (20.2)                                                                  | 224 (23.1)                                                             | 488 (23.2)                |                         |
| Asturias                                    | 93 (25.0)                                                            | 153 (20.0)                                                                  | 153 (15.8)                                                             | 399 (18.9)                |                         |
| Gipuzkoa                                    | 71 (19.1)                                                            | 194 (25.3)                                                                  | 178 (18.4)                                                             | 443 (21.0)                |                         |
| <b>Maternal age (mean,<br/>SD)</b>          | 30.41 (4.5)                                                          | 30.54 (4.2)                                                                 | 31.02 (4.1)                                                            | 30.74 (4.2)               | 0                       |
| <b>Child's sex (n, %<br/>male)</b>          | 196 (52.7)                                                           | 389 (50.7)                                                                  | 486 (50.2)                                                             | 1071 (50.8)               | 0                       |
| <b>Maternal education<br/>(n, %)</b>        |                                                                      |                                                                             |                                                                        |                           | 0.5                     |
| Primary                                     | 111 (29.9)                                                           | 194 (25.4)                                                                  | 235 (24.4)                                                             | 540 (25.8)                |                         |
| Secondary                                   | 154 (41.5)                                                           | 311 (40.8)                                                                  | 378 (39.3)                                                             | 843 (40.2)                |                         |
| University                                  | 106 (28.6)                                                           | 258 (33.8)                                                                  | 350 (36.3)                                                             | 714 (34.1)                |                         |
| <b>Maternal social class<br/>(n, %)</b>     |                                                                      |                                                                             |                                                                        |                           | 3.2                     |
| Managers/technicians                        | 67 (18.5)                                                            | 162 (22.0)                                                                  | 234 (24.8)                                                             | 463 (22.7)                |                         |
| Non-manual                                  | 98 (27.1)                                                            | 229 (31.2)                                                                  | 318 (33.7)                                                             | 645 (31.6)                |                         |
| Manual                                      | 197 (54.4)                                                           | 344 (46.8)                                                                  | 391 (41.5)                                                             | 932 (45.7)                |                         |
| <b>Paternal social class<br/>(n, %)</b>     |                                                                      |                                                                             |                                                                        |                           | 2.2                     |
| Managers/technicians                        | 68 (18.7)                                                            | 142 (19.1)                                                                  | 227 (23.8)                                                             | 437 (21.2)                |                         |
| Non-manual                                  | 78 (21.5)                                                            | 201 (27.0)                                                                  | 227 (23.8)                                                             | 506 (24.6)                |                         |
| Manual                                      | 217 (59.8)                                                           | 402 (54.0)                                                                  | 499 (52.4)                                                             | 1118 (54.3)               |                         |
| <b>Maternal country of<br/>birth (n, %)</b> |                                                                      |                                                                             |                                                                        |                           | 0.2                     |
| Spain                                       | 340 (91.6)                                                           | 733 (95.8)                                                                  | 914 (94.6)                                                             | 1987 (94.5)               |                         |
| Latin America                               | 22 (5.9)                                                             | 24 (3.1)                                                                    | 30 (3.1)                                                               | 76 (3.6)                  |                         |
| Europe                                      | 6 (1.6)                                                              | 8 (1.1)                                                                     | 20 (2.1)                                                               | 34 (1.6)                  |                         |
| Other                                       | 3 (0.8)                                                              | 0 (0.0)                                                                     | 2 (0.2)                                                                | 5 (0.2)                   |                         |
| <b>Paternal country of<br/>birth (n, %)</b> |                                                                      |                                                                             |                                                                        |                           | 0.2                     |
| Spain                                       | 347 (93.3)                                                           | 722 (95.0)                                                                  | 897 (92.9)                                                             | 1966 (93.5)               |                         |
| Latin America                               | 12 (3.2)                                                             | 25 (3.3)                                                                    | 32 (3.3)                                                               | 69 (3.3)                  |                         |
| Europe                                      | 6 (1.6)                                                              | 13 (1.7)                                                                    | 27 (2.8)                                                               | 46 (2.2)                  |                         |
| Other                                       | 7 (1.9)                                                              | 4 (0.5)                                                                     | 10 (1.0)                                                               | 21 (1.0)                  |                         |

|                                                                                                | <b>25(OH)D<sub>3</sub>-<br/>deficient (&lt;20<br/>ng/mL) (n=372)</b> | <b>25(OH)D<sub>3</sub>-<br/>insufficient (20-<br/>29 ng/mL)<br/>(n=767)</b> | <b>25(OH)D<sub>3</sub>-<br/>sufficient (&gt;=30<br/>ng/mL) (n=968)</b> | <b>Total<br/>(n=2107)</b> | <b>Missings<br/>(%)</b> |
|------------------------------------------------------------------------------------------------|----------------------------------------------------------------------|-----------------------------------------------------------------------------|------------------------------------------------------------------------|---------------------------|-------------------------|
| <b>Maternal pre-<br/>pregnancy BMI (n,<br/>%)</b>                                              |                                                                      |                                                                             |                                                                        |                           | 0.3                     |
| Underweight (<18.5)                                                                            | 24 (6.5)                                                             | 30 (3.9)                                                                    | 33 (3.4)                                                               | 87 (4.1)                  |                         |
| Normal weight (18.5,<br><25)                                                                   | 237 (64.1)                                                           | 539 (70.3)                                                                  | 698 (72.4)                                                             | 1474 (70.2)               |                         |
| Overweight (25, <30)                                                                           | 79 (21.4)                                                            | 144 (18.8)                                                                  | 158 (16.4)                                                             | 381 (18.1)                |                         |
| Obese (≥30)                                                                                    | 30 (8.1)                                                             | 54 (7.0)                                                                    | 75 (7.8)                                                               | 159 (7.6)                 |                         |
| <b>Maternal parity (n,<br/>%)</b>                                                              |                                                                      |                                                                             |                                                                        |                           | 0.2                     |
| 0                                                                                              | 218 (59.1)                                                           | 431 (56.3)                                                                  | 537 (55.5)                                                             | 1186 (56.4)               |                         |
| 1                                                                                              | 129 (35.0)                                                           | 294 (38.4)                                                                  | 359 (37.1)                                                             | 782 (37.2)                |                         |
| ≥2                                                                                             | 22 (6.0)                                                             | 41 (5.4)                                                                    | 71 (7.3)                                                               | 134 (6.4)                 |                         |
| <b>Maternal smoking<br/>during 1<sup>st</sup> trimester<br/>of pregnancy (n, %)</b>            | 81 (22.3)                                                            | 125 (16.7)                                                                  | 146 (15.2)                                                             | 352 (17.0)                | 1.8                     |
| <b>Partner smoking at<br/>home during 1<sup>st</sup><br/>trimester of<br/>pregnancy (n, %)</b> | 123 (33.8)                                                           | 215 (29.0)                                                                  | 266 (27.8)                                                             | 604 (29.3)                | 2.1                     |

BMI=body mass index; SD=standard deviation.

Supplementary Table S2. Instruments used to measure the outcome domains and children's ages when they were applied for each region

| Domain               | Instrument | Evaluator    | Age           |            |          |          |
|----------------------|------------|--------------|---------------|------------|----------|----------|
|                      |            |              | 5 years       | 8 years    | 14 years | 18 years |
| ASD symptoms         | CAST       | Psychologist | A, G, S, V    |            |          |          |
| Social competence    | CPSCS      | Teachers     | A, G, M, S, V |            |          |          |
| Behavioural problems | SDQ        | Parents      | G             | A, G, S, V | M        | M        |
|                      | CBCL       | Parents      |               | G, S, V    |          |          |
| ADHD symptoms        | CPRS       | Parents      |               | A, G, S, V |          | M        |

*Domains:* ADHD=Attention Deficit and Hyperactivity Disorder; ASD=Autism Spectrum Disorder. *Instruments:* CAST=Childhood Autism Spectrum Test; CBCL=Child Behaviour Checklist; CPRS=Conners' Parent Rating Scale-Revised (short form); CPSCS=California Preschool Social Competence Scale; SDQ=Strengths and Difficulties Questionnaire.

*Regions:* A=Asturias; G=Gipuzkoa; M=Menorca; S=Sabadell; V=Valencia.

Supplementary Table S3. Distribution of outcome scores according to maternal 25(OH)D<sub>3</sub> concentrations in pregnancy

| Domains              | Instruments                     | 25(OH)D <sub>3</sub> -deficient<br>(<20 ng/mL) | 25(OH)D <sub>3</sub> -insufficient<br>(20-29 ng/mL) | 25(OH)D <sub>3</sub> -sufficient<br>(≥30 ng/mL) |
|----------------------|---------------------------------|------------------------------------------------|-----------------------------------------------------|-------------------------------------------------|
| ASD symptoms         | CAST-5y (n=1510)<br>(mean, SD)  | 6.53 (3.31)                                    | 6.31 (3.35)                                         | 5.97 (3.14)                                     |
| Social competence    | CPSCS-5y (n=1481)<br>(mean, SD) | 93.29 (12.61)                                  | 95.27 (13.06)                                       | 96.65 (11.16)                                   |
| Behavioural problems | SDQ-5y (n=263)<br>(mean, SD)    | 9.79 (4.96)                                    | 8.19 (4.41)                                         | 8.82 (4.54)                                     |
| Behavioural problems | SDQ-8y (n=1622)<br>(mean, SD)   | 9.10 (5.11)                                    | 8.71 (5.13)                                         | 8.76 (5.06)                                     |
| Behavioural problems | CBCL-8y (n=1206)<br>(mean, SD)  | 28.72 (20.30)                                  | 24.90 (18.35)                                       | 26.67 (19.30)                                   |
| ADHD symptoms        | CPRS-8y (n=1622)<br>(mean, SD)  | 8.39 (7.43)                                    | 7.76 (6.79)                                         | 8.03 (7.06)                                     |
| Behavioural problems | SDQ-14y (n=198)<br>(mean, SD)   | 10.38 (4.22)                                   | 9.57 (4.36)                                         | 9.26 (4.59)                                     |
| Behavioural problems | SDQ-18y (n=149)<br>(mean, SD)   | 9.25 (3.91)                                    | 9.97 (4.04)                                         | 9.27 (4.42)                                     |
| ADHD symptoms        | CPRS-18y (n=151)<br>(mean, SD)  | 4.96 (4.41)                                    | 7.00 (6.63)                                         | 5.82 (5.83)                                     |

*Domains:* ADHD=Attention Deficit and Hyperactivity Disorder; ASD=Autism Spectrum Disorder. *Instruments:* CAST=Childhood Autism Spectrum Test; CBCL=Child Behaviour Checklist; CPRS=Conners' Parent Rating Scale-Revised (short form); CPSCS=California Preschool Social Competence Scale; SDQ=Strengths and Difficulties Questionnaire.

Supplementary Table S4. Associations between child 25(OH)D<sub>3</sub> concentrations at 4 years old and maternal 25(OH)D<sub>3</sub> concentrations in pregnancy and social competence<sup>a</sup> in a subsample (n=597)

| Measurement period            | Regions    | Levels (n)                      | Fully adjusted (coef, 95%CI) <sup>b</sup> |
|-------------------------------|------------|---------------------------------|-------------------------------------------|
| Child 25(OH)D <sub>3</sub>    | V, S, A, G | Continuous (per 10 ng/mL) (597) | -0.22 (-1.07, 0.64)                       |
|                               |            | <20 ng/mL (153)                 | Reference                                 |
|                               |            | 20-29.9 ng/mL (209)             | -0.29 (-2.68, 2.11)                       |
|                               |            | ≥30 ng/mL (235)                 | -1.22 (-4.05, 1.62)                       |
| Maternal 25(OH)D <sub>3</sub> | V, S, A, G | Continuous (per 10 ng/mL) (597) | 0.76 (-0.07, 1.60)                        |
|                               |            | <20 ng/mL (126)                 | Reference                                 |
|                               |            | 20-29.9 ng/mL (222)             | <b>4.20 (1.80, 6.59)</b>                  |
|                               |            | ≥30 ng/mL (249)                 | <b>3.39 (1.03, 5.74)</b>                  |

*Regions:* A=Asturias; G=Gipuzkoa; S=Sabadell; V=Valencia. <sup>a</sup>California Preschool Social Competence Scale (CPSCS); <sup>b</sup>Linear regression model adjusted for region, maternal age, maternal education level, maternal occupation, maternal country of birth, maternal smoking during pregnancy, partner smoking at home during pregnancy. Multiple imputation and inverse probability weighting were applied. Bold = p<0.05.
